# Supplementary material for: Experiences of Persons With Serious Mental Illness During the COVID-19 Pandemic
Source: Atypon-hosted journal article supplement (doi:10.1176/appi.ps.202100130), 2021-06-30
Supplement: appi.ps.202100130.ds001.pdf [file appi.ps.202100130.ds001.pdf]

**Supplement Table. Frequency of Mental Distress, Comparison between Psychiatric Groups and a Non-psychiatric Group<sup>1</sup>**

|                    | Log Rank Test Score | Odds Ratios and 95% Confidence Intervals |                         |                                  |
|--------------------|---------------------|------------------------------------------|-------------------------|----------------------------------|
|                    |                     | Schizophrenia (N=50)                     | Bipolar Disorder (N=51) | Major Depressive Disorder (N=29) |
| 1-Nervous          | 31.31***            | 2.54 (1.20, 5.35)*                       | 2.75 (1.36, 5.53)**     | 5.02 (2.20, 11.45)**             |
| 2-Depressed        | 31.11***            | 3.40 (1.46, 7.61)**                      | 4.30 (1.99, 9.27)***    | 4.82 (2.09, 11.14)***            |
| 3-Hyperarousal     | 26.03***            | 6.46 (1.81, 23.06)**                     | 12.16 (3.61, 41.00)***  | 7.72 (2.05, 29.04)**             |
| 4-Lonely           | 24.98***            | 4.02 (1.86, 8.69)***                     | 2.79 (1.38, 5.64)**     | 4.74 (2.03, 11.06)***            |
| 5-Hopeful          | 19.94**             | 0.45 (0.21, 0.97)*                       | 0.41 (0.21, 0.82)**     | 0.37 (0.16, 0.85)*               |
| 6-Trouble sleeping | 19.27**             | 0.38 (0.17, 0.83)*                       | 1.27 (0.64, 2.52)       | 2.64 (1.18, 5.89)*               |

<sup>1</sup> The numbers of the items correspond to the numbers of the items in Figure 1. Items inquired, “In the past week, how often have you ...” Item responses were rated on a 4 point scale from “Rarely” to “Most of the time.” Items were 1-Felt nervous, anxious, or on edge; 2- Felt depressed; 3 -Had physical reactions when thinking about your experience with the COVID-19 epidemic; 4- Felt lonely; 5 -Felt hopeful about the future (direction of responses reversed); 6 -Had trouble sleeping. Odds Ratios and Log Rank Test scores from ordered logistic regression analyses with the non-psychiatric individuals (n=65) as the reference group. All analyses adjusted for age, race, and gender.  $p > .05$  except where indicated; \*  $p < .05$ , \*\*  $p < .0125$ , \*\*\*  $p < .001$ .

**Supplement Table. COVID-related Concerns, Comparison between Psychiatric Groups and a Non-psychiatric Group<sup>1</sup>**

|                     | Log Rank Test Score | Odds Ratios and 95% Confidence Intervals |                         |                                  |
|---------------------|---------------------|------------------------------------------|-------------------------|----------------------------------|
|                     |                     | Schizophrenia (N=50)                     | Bipolar Disorder (N=51) | Major Depressive Disorder (N=29) |
| 1-Overwhelmed       | 24.21***            | 4.36 (2.06, 9.20)***                     | 1.35 (0.68, 2.67)       | 1.52 (0.69, 3.37)                |
| 2-Medical bills     | 19.69**             | 3.96 (1.86, 8.43)***                     | 1.95 (0.98, 3.90)       | 1.12 (0.50, 2.50)                |
| 3-Food              | 22.36***            | 3.88 (1.77, 8.47)***                     | 2.98 (1.46, 6.09)**     | 1.39 (0.61, 3.16)                |
| 4-Concentration     | 14.59*              | 3.41 (1.63, 7.14)***                     | 1.28 (0.63, 2.62)       | 1.71 (0.77, 3.80)                |
| 5-Anxious           | 12.77*              | 2.90 (1.40, 6.04)**                      | 1.49 (0.76, 2.94)       | 1.87 (0.83, 4.25)                |
| 6-Money             | 15.88*              | 2.36 (1.11, 4.99)*                       | 2.53 (1.28, 4.98)**     | 1.21 (0.55, 2.69)                |
| 7-Infection-Self    | 16.22*              | 2.22 (1.06, 4.64)*                       | 0.51 (0.26, 1.01)       | 0.73 (0.34, 1.59)                |
| 8-Income            | 9.50                | 1.71(0.82, 3.55)                         | 1.33 (0.68, 2.61)       | 0.65 (0.29, 1.47)                |
| 9-Spending          | 7.01                | 1.57 (0.76, 3.26)                        | 1.29 (0.65, 2.57)       | 1.18 (0.54, 2.60)                |
| 10-Sleep            | 6.56                | 1.49 (0.71, 3.11)                        | 1.51 (0.74, 3.10)       | 2.15 (0.95, 4.87)                |
| 11-Infection-Others | 2.67                | 1.35 (0.64, 2.82)                        | 1.06 (0.54, 2.11)       | 0.99 (0.44, 2.24)                |
| 12-Transmission     | 11.81               | 0.70 (0.34, 1.35)                        | 0.67 (0.34, 1.29)       | 0.76 (0.35, 1.69)                |

<sup>1</sup> The numbers of items correspond to the numbers of items in Figure 2. Items were rated on 5 point scale from “Strongly Disagree” to “Strongly Agree.” Items were: 1-I am feeling overwhelmed by COVID-19; 2- I am worried about medical bills if I get sick from COVID-19; 3- I am worried about having enough food because of COVID-19; 4- I have difficulties concentrating because of COVID-19; 5- Thinking about COVID-19 makes me very anxious; 6- I am worried about money because of COVID 19; 7- I am very worried about getting COVID-19;8- I am worried about loss of income if I get sick from COVID-19; 9- I am spending more money because of COVID-19; 10- I have a hard time sleeping because of COVID-19; 11- I am very worried about my family/friends getting COVID-19; 12 -I am very worried about giving someone else COVID-19. Odds Ratios and Log Rank Test scores from ordered logistic regression analyses with the non-psychiatric individuals (n=65) as the reference group. All analyses adjusted for age, race, and gender. p>.05 except where indicated; \* p<.05, \*\*p<.0125, \*\*\*p<.001.
